# Supplementary material for: Effects of doping atoms (Sb, Te, Sn, P and Bi) on the equilibrium shape of Mg2Si from first-principles calculations
Source: Royal Society of Chemistry journal article supplement (doi:10.1039/c6ce01291d), 2016-01-01
Supplement: c6ce01291d1.pdf [file c6ce01291d1.pdf]

## **Electronic Supplementary Information**

### **Effects of doping atoms (Sb, Te, Sn, P and Bi) on the equilibrium shape of Mg<sub>2</sub>Si from first-principles calculations**

Hui-Yuan Wang, Xue-Na Xue, Xin-Yu Xu, Cheng Wang\*, Lei Chen, Qi-Chuan Jiang

*Key Laboratory of Automobile Materials of Ministry of Education & School of  
Materials Science and Engineering, Nanling Campus, Jilin University, No. 5988  
Renmin Street, Changchun 130025, PR China*

E-mail: [chengwang@jlu.edu.cn](mailto:chengwang@jlu.edu.cn) (C. Wang) Tel/fax: +86 431 8509 4741

**Table S1** The percentage of the change of the interlayer spacing for the relaxed Mg<sub>2</sub>Si (100) slabs relative to the bulk spacing.

| Termination | Change in interlayer | Slab thickness ( <i>N</i> ) |        |       |
|-------------|----------------------|-----------------------------|--------|-------|
|             |                      | 5(%)                        | 9(%)   | 13(%) |
| <b>Si</b>   | $\Delta d_{1-2}$     | -10.10                      | -10.79 | -7.78 |
|             | $\Delta d_{2-3}$     | 4.96                        | 5.90   | 5.08  |
|             | $\Delta d_{3-4}$     |                             | 0.69   | -1.07 |
|             | $\Delta d_{4-5}$     |                             | 0.56   | 2.45  |
|             | $\Delta d_{5-6}$     |                             |        | -1.76 |
|             | $\Delta d_{6-7}$     |                             |        | -0.69 |
|             |                      | 7(%)                        | 11(%)  | 15(%) |
| <b>Mg</b>   | $\Delta d_{1-2}$     | -0.63                       | -0.94  | -1.51 |
|             | $\Delta d_{2-3}$     | 1.76                        | 1.82   | 2.01  |
|             | $\Delta d_{3-4}$     | -0.13                       | -0.56  | -0.56 |
|             | $\Delta d_{4-5}$     |                             | 0.56   | 1.32  |
|             | $\Delta d_{5-6}$     |                             | 0.38   | -0.19 |
|             | $\Delta d_{6-7}$     |                             |        | 0.13  |
|             | $\Delta d_{7-8}$     |                             |        | 0.63  |

**Table S2** The percentage of the change of the interlayer spacing for the relaxed Mg<sub>2</sub>Si (111) slabs relative to the bulk interlayer spacing.

| Termination  | Change in interlayer | Slab thickness ( <i>N</i> ) |        |        |
|--------------|----------------------|-----------------------------|--------|--------|
|              |                      | 6(%)                        | 9(%)   | 12(%)  |
| <b>Mg-I</b>  | $\Delta d1-2$        | -31.85                      | -24.46 | -31.09 |
|              | $\Delta d2-3$        | 15.22                       | 8.37   | 12.07  |
|              | $\Delta d3-4$        | -5.98                       | -2.28  | -2.55  |
|              | $\Delta d4-5$        |                             | 0.00   | 4.57   |
|              | $\Delta d5-6$        |                             |        | -1.85  |
|              | $\Delta d6-7$        |                             |        | 2.34   |
|              |                      | 8(%)                        | 11(%)  | 14(%)  |
| <b>Mg-II</b> | $\Delta d1-2$        | -1.85                       | -0.76  | -3.42  |
|              | $\Delta d2-3$        | 3.70                        | 2.39   | 4.02   |
|              | $\Delta d3-4$        | 1.74                        | 4.89   | 0.43   |
|              | $\Delta d4-5$        | 0.00                        | 1.20   | 0.43   |
|              | $\Delta d5-6$        |                             | 2.39   | 0.00   |
|              | $\Delta d6-7$        |                             |        | 0.76   |
|              | $\Delta d7-8$        |                             |        | 0.60   |
|              |                      | 7(%)                        | 10(%)  | 13(%)  |
| <b>Si</b>    | $\Delta d1-2$        | -34.24                      | -35.98 | -18.48 |
|              | $\Delta d2-3$        | 12.93                       | 14.62  | 6.47   |
|              | $\Delta d3-4$        | 1.96                        | 0.11   | 4.57   |
|              | $\Delta d4-5$        |                             | 4.46   | -2.83  |
|              | $\Delta d5-6$        |                             | 0.76   | 1.25   |
|              | $\Delta d6-7$        |                             |        | 2.28   |

## **Fabrication procedure of Al-20 wt.% Mg<sub>2</sub>Si alloy**

The Al-12.6 wt.% Si alloy was prepared at 750 °C in a graphite crucible. Pure Mg preheated at 200 °C in a resistance furnace was then added to the molten alloys. The melts were manually stirred for about 2 min, held at 750 °C for 20 min. Then the molten alloys was poured to a metal mold preheated at 150 °C to produce ingots Al-20 wt.% Mg<sub>2</sub>Si alloys. The Al-20 wt.% Mg<sub>2</sub>Si alloys were remelted at 800 °C, and then designed contents of the modifiers (pure Sn (99.90 wt.%, purity), pure Te (99.00 wt.%, purity) and Al-3P master alloy) were added to the melts to get experimental alloys. The detailed fabrication procedure was reported elsewhere.<sup>8</sup>
